# Supplementary material for: An ultrasensitive strain sensor with a wide strain range based on graphene armour scales
Source: Royal Society of Chemistry journal article supplement (doi:10.1039/c8nr02652a), 2018-01-01

## **An Ultrasensitive Strain Sensor with Large Strain Range Based on Graphene Armour Scales**

Yi-Fan Yang<sup>1,2,†</sup>, Lu-Qi Tao<sup>1,2,†</sup>, Yu Pang<sup>1,2</sup>, He Tian<sup>1,2</sup>, Zhen-Yi Ju<sup>1,2</sup>,  
Xiao-Ming Wu<sup>1,2,\*</sup>, Yi Yang<sup>1,2,\*</sup> and Tian-Ling Ren<sup>1,2,3,\*</sup>

<sup>1</sup>Institute of Microelectronics, Tsinghua University, Beijing 100084, China,

<sup>2</sup>Tsinghua National Laboratory for Information Science and Technology (TNList), Tsinghua University, Beijing 100084, China;

<sup>3</sup>State Key Laboratory of Transducer Technology, Chinese Academy of Sciences, Beijing 100190, China

<sup>†</sup> These authors contributed equally to this work

## **Supplementary Information**

Figure S1 The absolute resistance change versus strain and the initial resistance of the sensor before producing the armour scales.

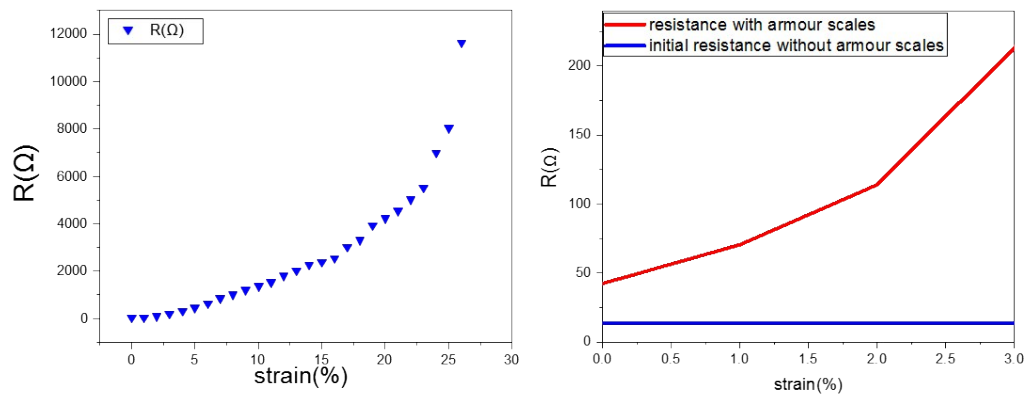

Figure S2 The 5000 cycles test and zoom-in view of the relative resistance change under the strain of 13% of the sensor.

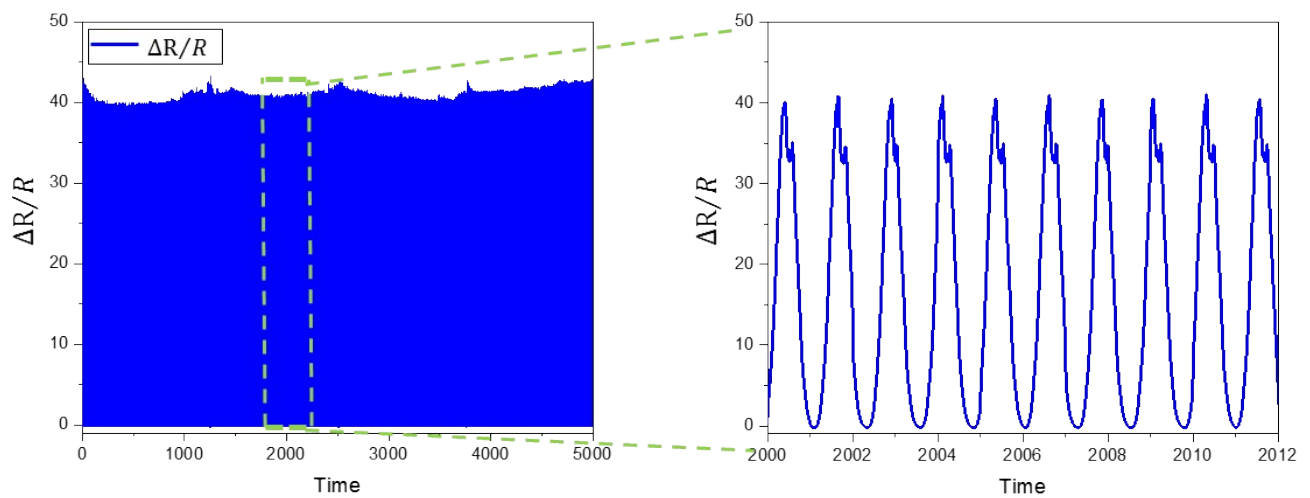

Figure S3 The sample to sample variation of this sensor.

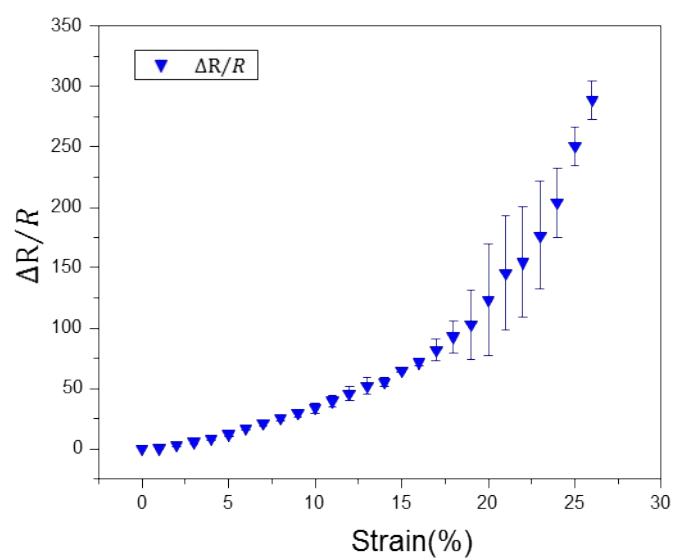

Figure S4 The hysteretic property of the sensor.

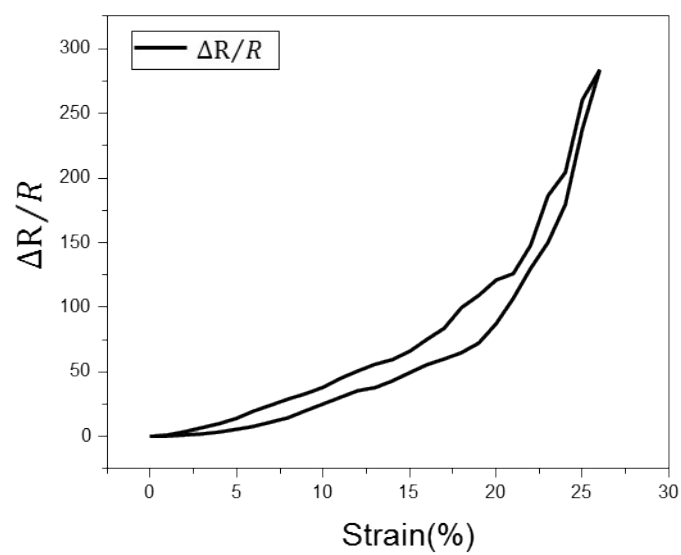

Supplement: c8nr02652a1.pdf [file c8nr02652a1.pdf]
